# Supplementary material for: New self-assembly hybrid compounds based on arsenic–vanadium clusters and transition metal mixed-organic-ligand complexes
Source: Royal Society of Chemistry journal article supplement (doi:10.1039/c5ce01983d), 2015-12-11
Supplement: c5ce01983d1.pdf [file c5ce01983d1.pdf]

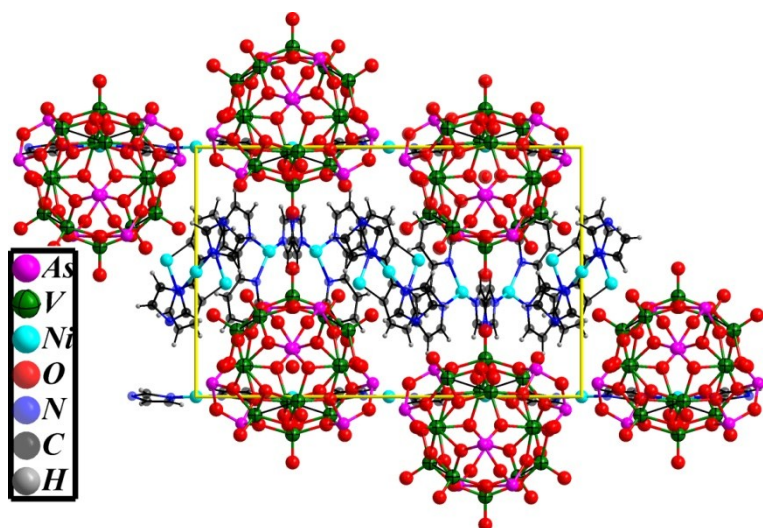

Fig. s1 packing structure of compound 1.

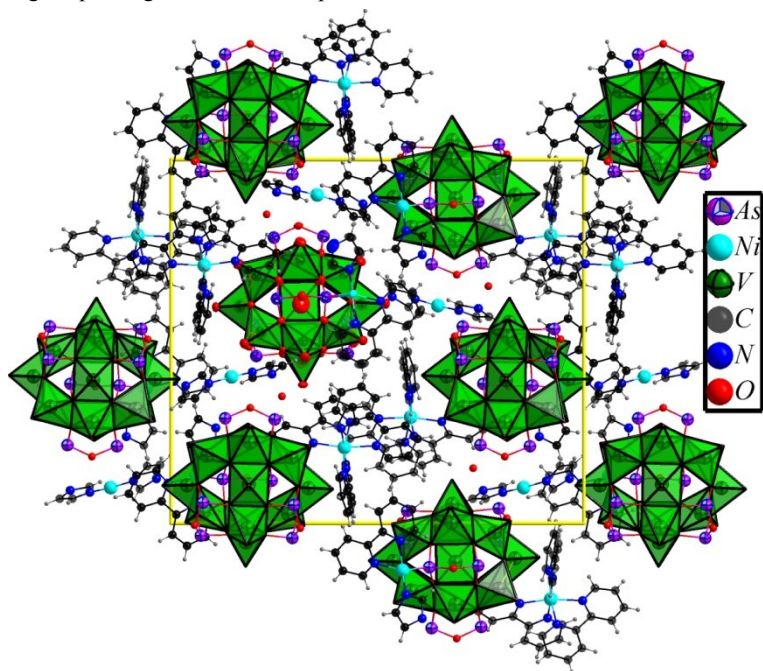

Fig. s2 packing structure of compound 1a.

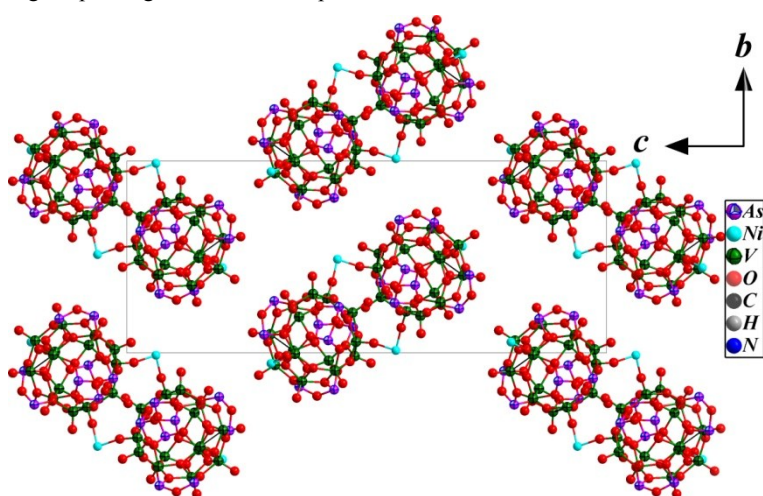

Fig. s3 packing structure of compound 2, carbons, nitrogens and hydrogens are omitted for clarity.

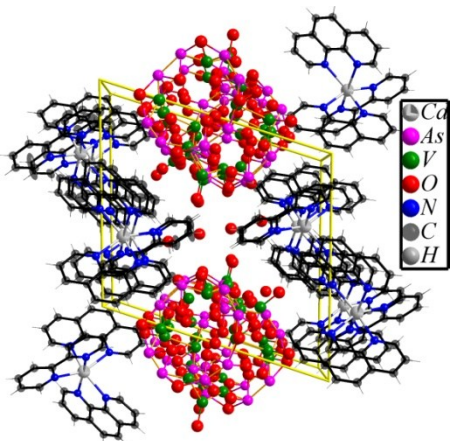

Fig. s4 packing structure of compound 4.

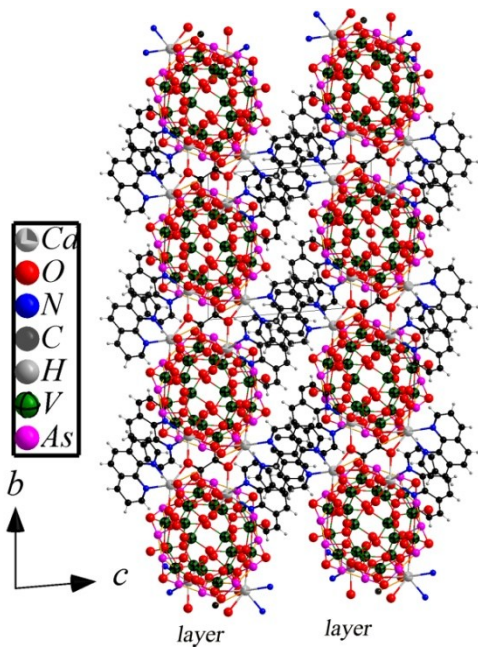

Fig. s5 packing structure of compound 5.

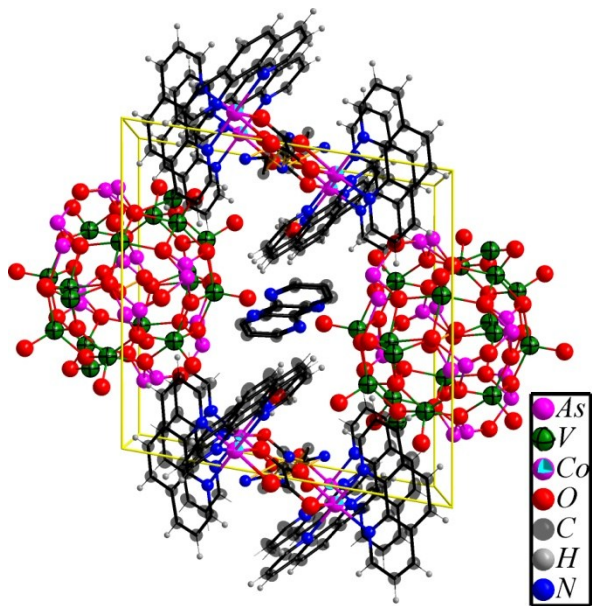

Fig. s6 packing structure of compound 6.

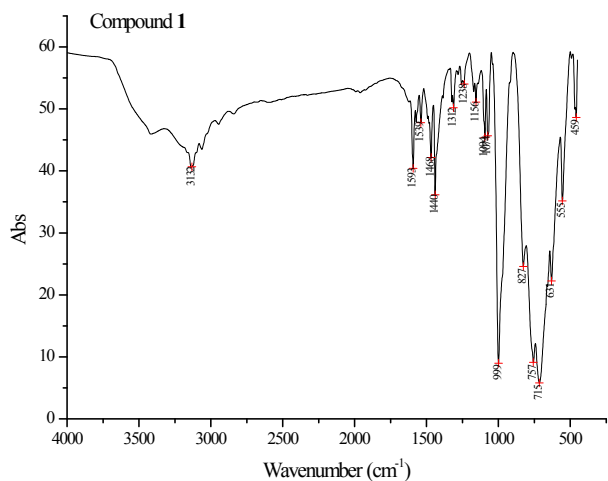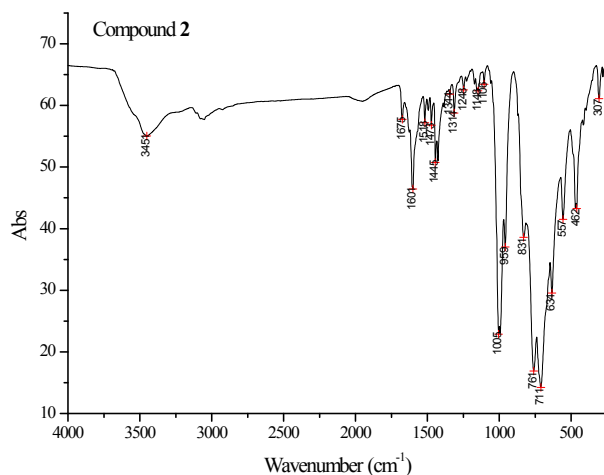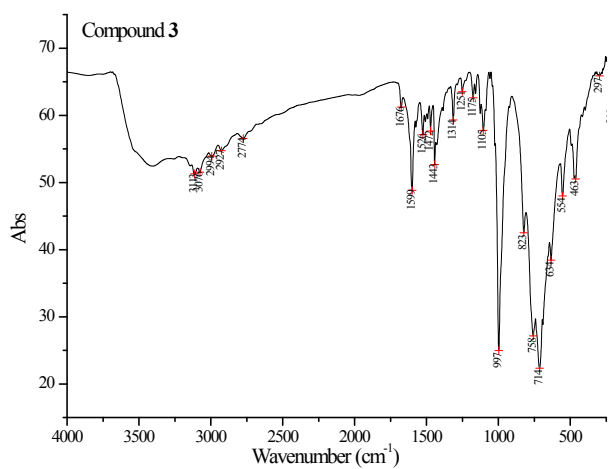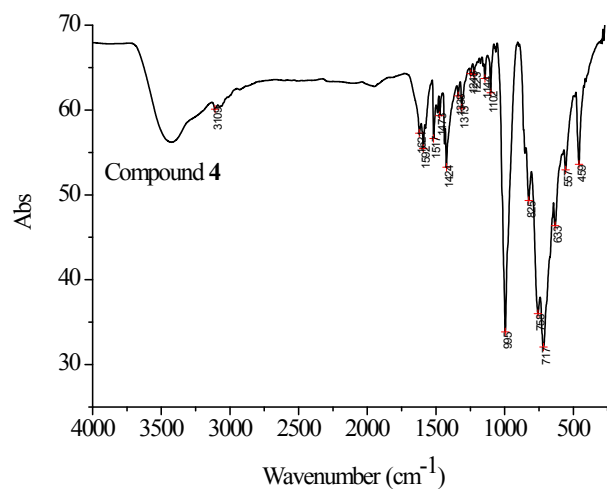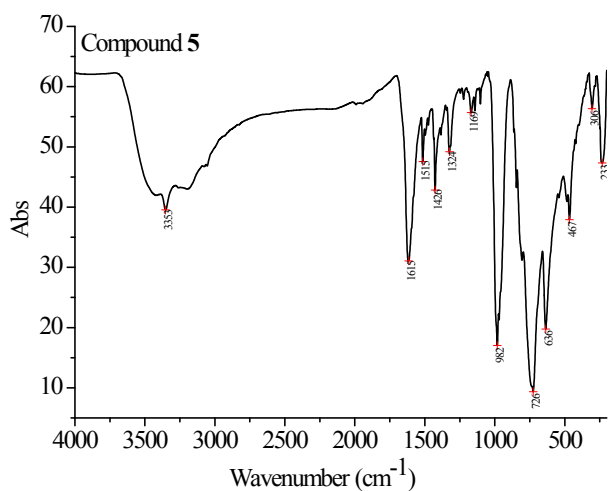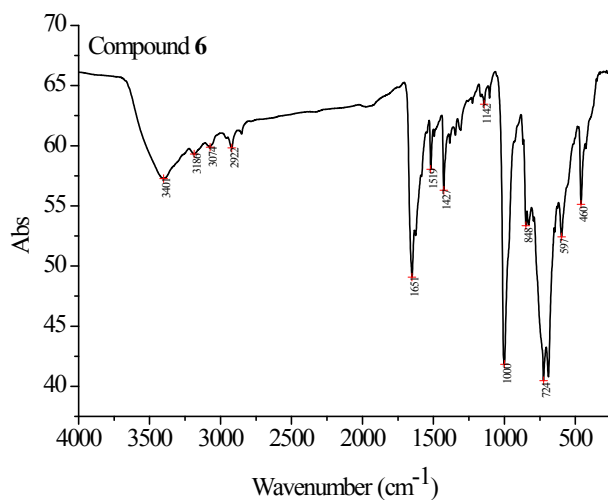

Fig. s7 IR spectra of compounds 1-6.

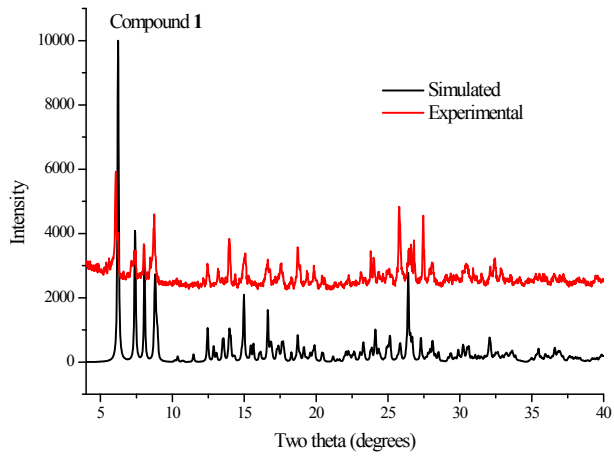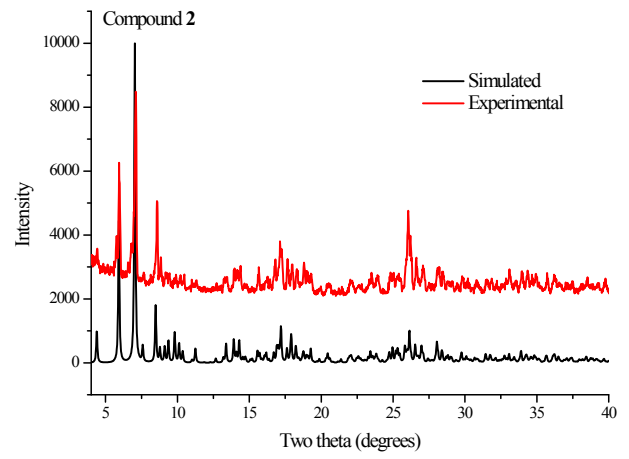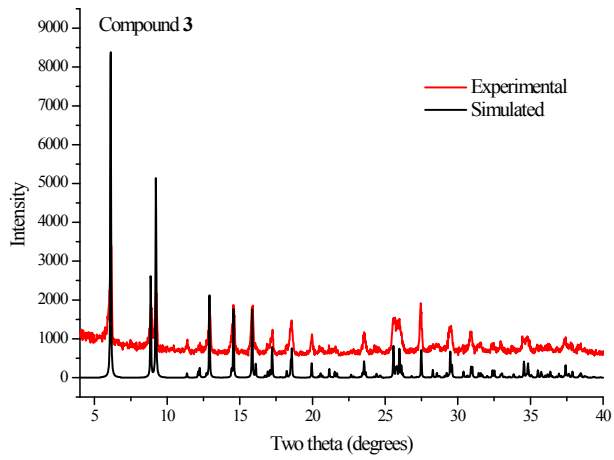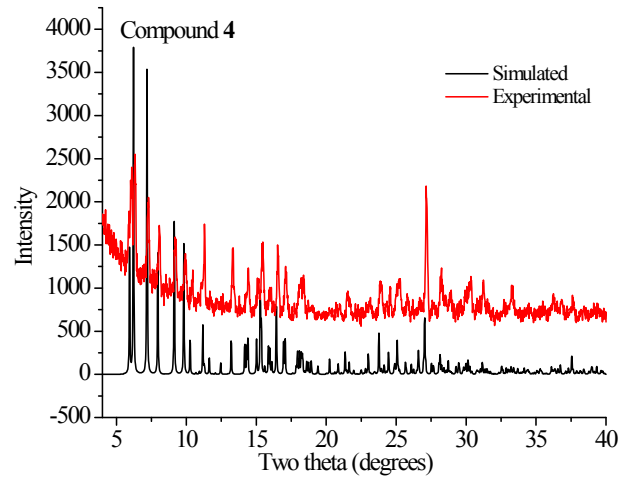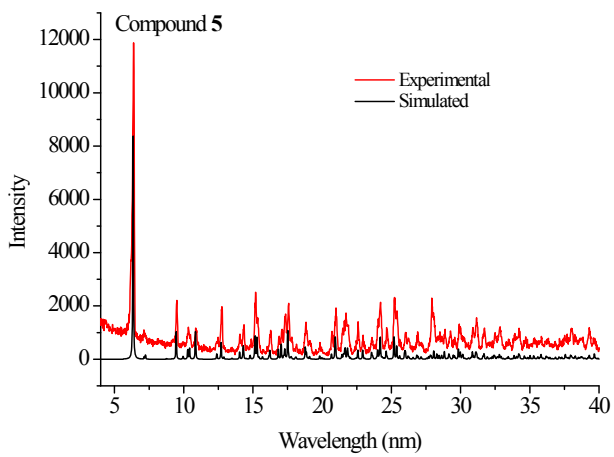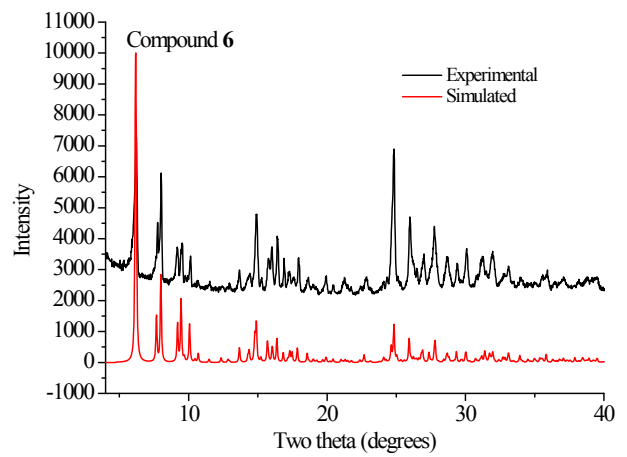

Fig. s8 Simulated and experimental XRD patterns of compounds 1-6.

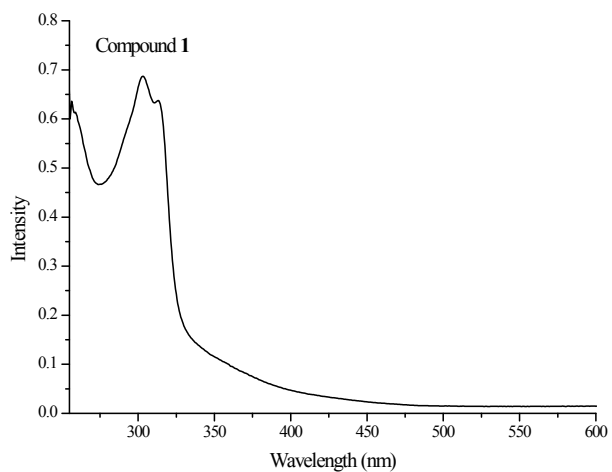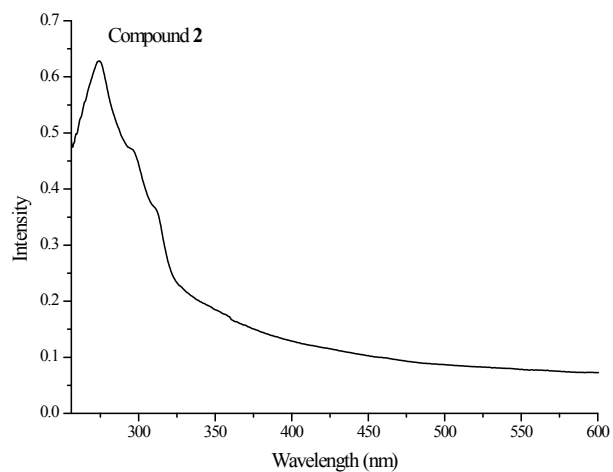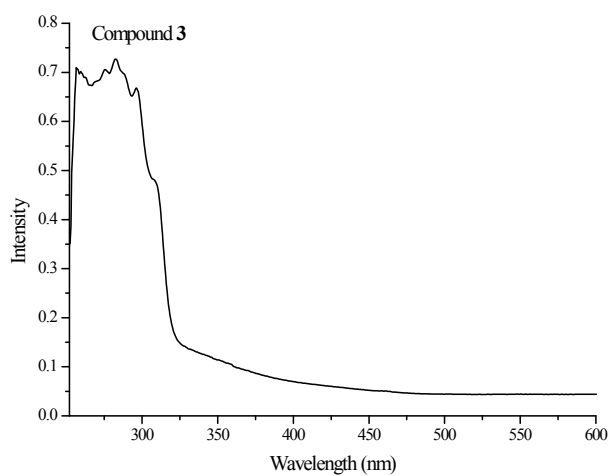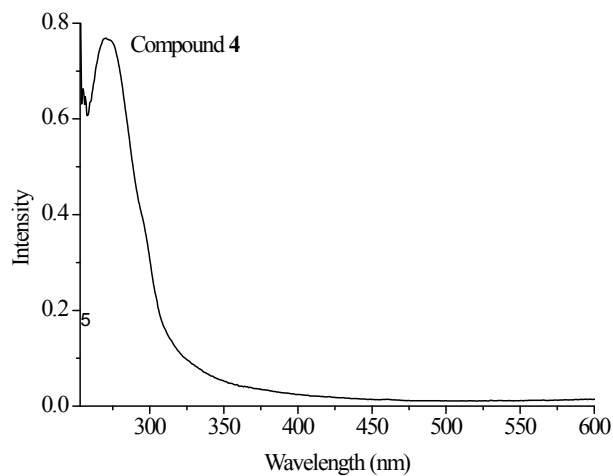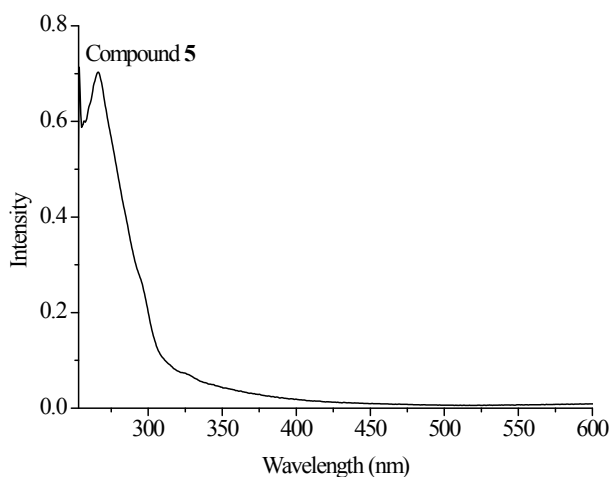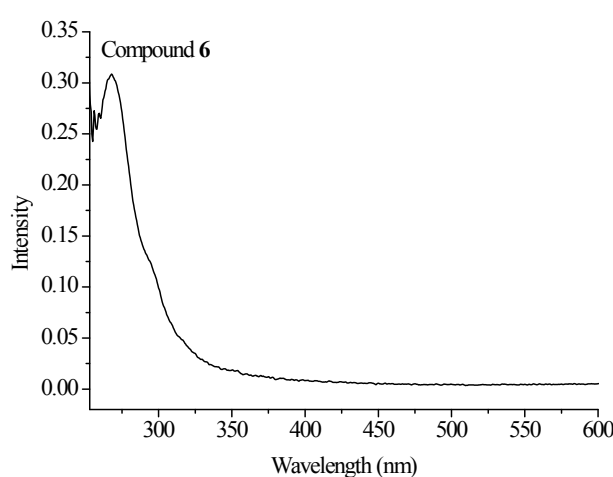

Fig. s9 UV-Vis spectra of compounds 1-6.

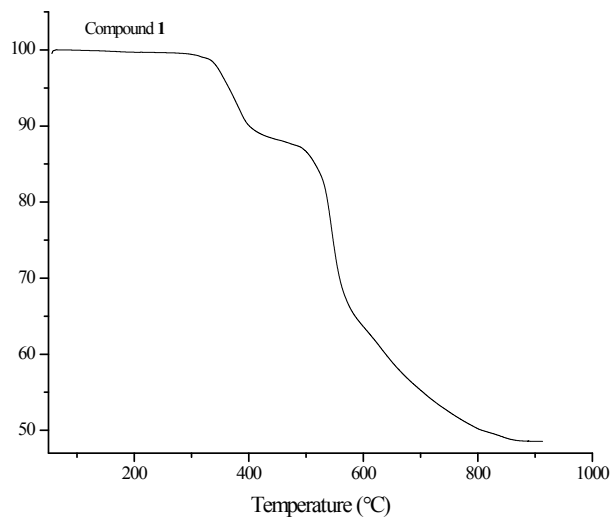

Fig. s10 TG curve of compound 1.
